# Supplementary material for: Olefin metathesis over supported MoOx catalysts: influence of the oxide support
Source: Royal Society of Chemistry journal article supplement (doi:10.1039/d2cy01612e), 2022-11-29
Supplement: d2cy01612e1.pdf [file d2cy01612e1.pdf]

## Supporting Information

### Olefin Metathesis over Supported $\text{MoO}_x$ catalysts: Influence of the Oxide Support

Bin Zhang, Michael E. Ford, Eli Ream, Israel E. Wachs

*Operando* Molecular Spectroscopy and Catalysis Laboratory, Department of Chemical & Biomolecular Engineering,  
Lehigh University, Bethlehem, PA, 18015, United States

Corresponding Author: Prof. Israel E. Wachs, Email: [iew0@lehigh.edu](mailto:iew0@lehigh.edu)

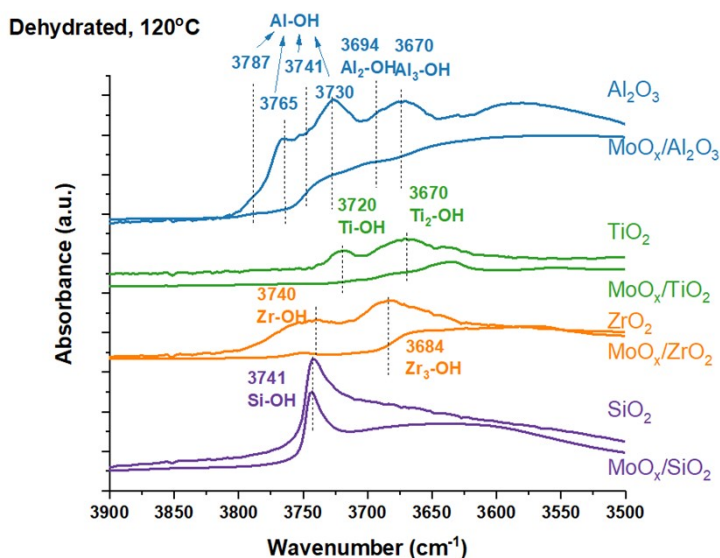

**Figure S1.** *In situ* DRIFTS spectra of the surface hydroxyl region of the Mo-free oxide supports and supported  $\text{MoO}_x$  catalysts under dehydrated conditions.

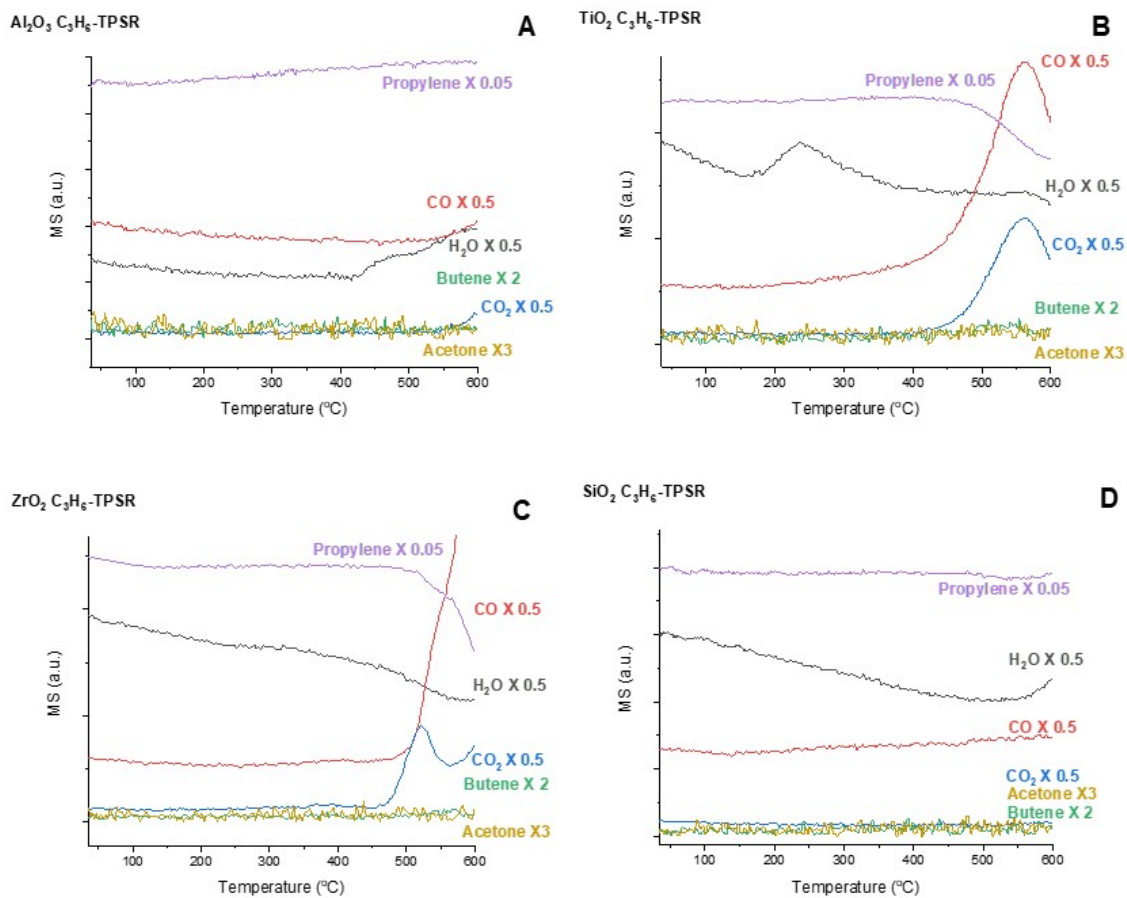

**Figure S2.** Propylene-TPSR (30-600°C) with online MS for the Mo-free oxide supports: (A) Al<sub>2</sub>O<sub>3</sub>, (B) TiO<sub>2</sub>, (C) ZrO<sub>2</sub>, (D) SiO<sub>2</sub>.

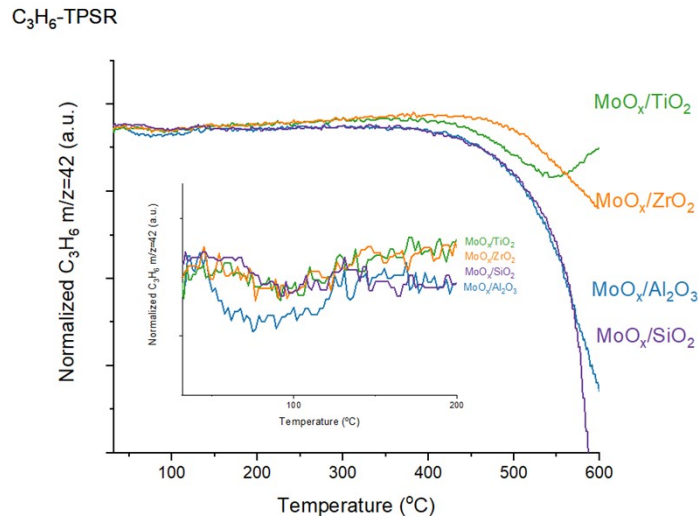

**Figure S3.** Normalized  $C_3H_6$  spectra during Propylene-TPSR (30-600°C) with online MS for the supported  $MoO_x$  catalysts. The  $C_3H_6$  signals ( $m/z=42$ ) were normalized with the Ar signal ( $m/z=20$ ).

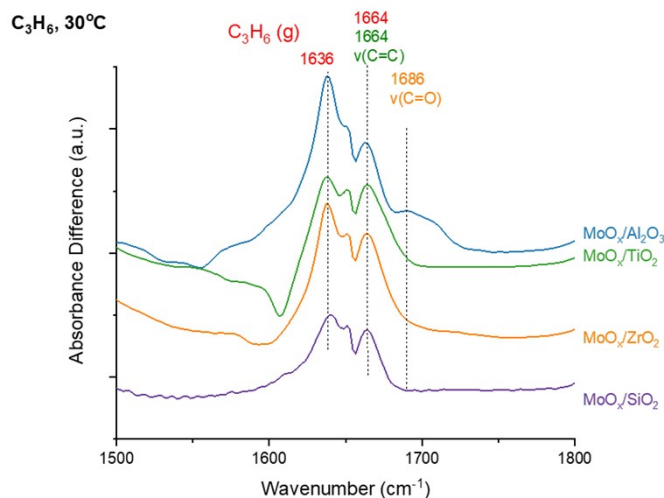

**Figure S4.** *In situ* DRIFTS difference spectra of supported  $MoO_x$  catalysts after propylene adsorption at 30°C for 30min. The spectra of dehydrated  $MoO_x$  catalysts at 30°C were subtracted from the spectra of the corresponding  $MoO_x$  catalysts after propylene adsorption at 30°C

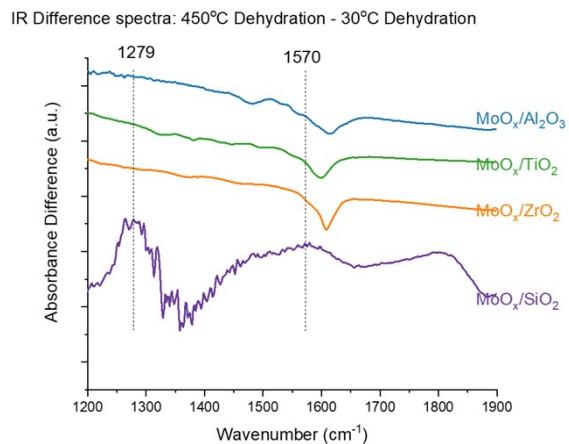

**Figure S5.** *In situ* DRIFTS difference spectra of supported MoO<sub>x</sub> catalysts under dehydrated conditions. The spectra of the dehydrated supported MoO<sub>x</sub> catalysts at 30°C were subtracted from the spectra of the corresponding dehydrated supported MoO<sub>x</sub> catalysts at 450°C.

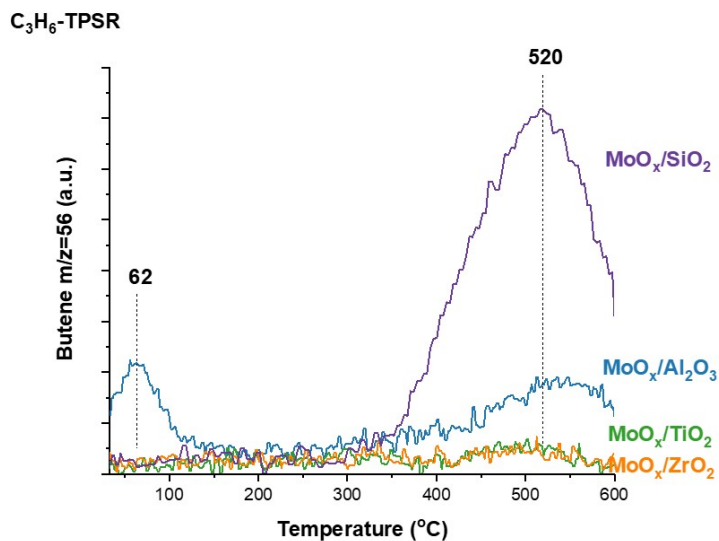

**Figure S6.** Butene MS signal during Propylene-TPSR (30-600°C) for the supported MoO<sub>x</sub> catalysts.
